# Supplementary material for: Weak thermal quenching of the luminescence in the Ca3Sc2Si3O12:Ce3+garnet phosphor
Source: Royal Society of Chemistry journal article supplement (doi:10.1039/c8tc02907e), 2018-01-01
Supplement: c8tc02907e1.pdf [file c8tc02907e1.pdf]

## Weak thermal quenching of the luminescence in the $\text{Ca}_3\text{Sc}_2\text{Si}_3\text{O}_{12}:\text{Ce}^{3+}$ garnet phosphor (Supporting information)

Suchinder K. Sharma,<sup>a,‡</sup> Yuan-Chih Lin,<sup>a</sup> Irene Carrasco,<sup>b,§</sup> Tobias Tingberg,<sup>c</sup> Marco Bettinelli,<sup>b</sup> Maths Karlsson<sup>\*a</sup>

<sup>a</sup>Department of Chemistry and Chemical Engineering, Chalmers University of Technology, SE-412 96 Göteborg, Sweden. Tel: +46 31 772 6770; E-mail: maths.karlsson@chalmers.se (Maths Karlsson); <sup>b</sup>Luminescent Materials Laboratory, Department of Biotechnology, University of Verona, and INSTM, UdR Verona, Strada Le Grazie 15, 371 34 Verona, Italy; <sup>c</sup>Department of Microtechnology and Nanoscience, Chalmers University of Technology, 412 96 Göteborg, Sweden <sup>‡</sup>Current address: Institute of Applied Physics, TU Bergakademie Freiberg, Leipziger Str. 23, 09596 Freiberg, Germany.; <sup>§</sup>Current address: Advanced Technology Institute, Department of Electrical and Electronic Engineering, University of Surrey, Guildford GU2 7XH, United Kingdom;

### 1 Supporting figures

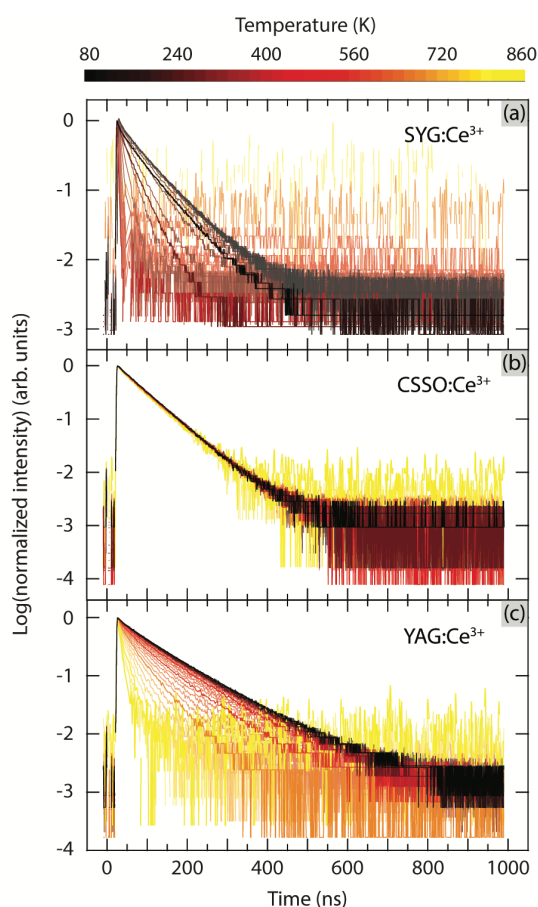

**Fig. S1** Variable temperature luminescence decay curves for (a)  $\text{SYG}:\text{Ce}^{3+}$ , (b)  $\text{CSSO}:\text{Ce}^{3+}$ , and (c)  $\text{YAG}:\text{Ce}^{3+}$ .

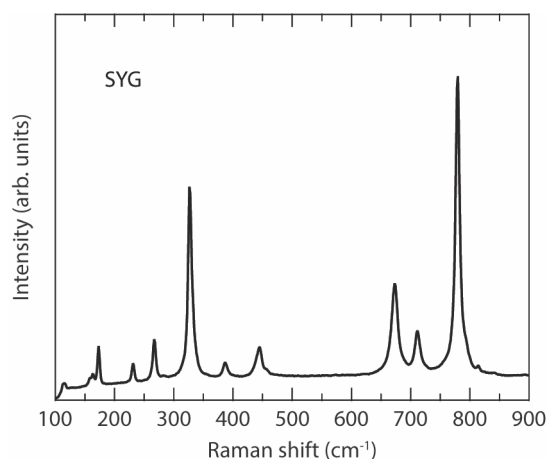

**Fig. S2** Room temperature Raman spectrum of SYG, measured using a Renishaw InVia Reflex spectrometer equipped with a CCD and a 2400 l/mm grating, as a 532 nm laser source was focused on the sample through a  $\times 50$  objective lens ( $\text{NA} = 0.5$ , power  $\approx 2$  mW on the sample), for 10 s of acquisition time over 16 accumulations.<sup>S1</sup>

### References

S1 Y.-C. Lin, P. Erhart, M. Bettinelli, M. Karlsson, *To be published*.
